# Supplementary material for: A Novel Transcription Factor VPA0041 Was Identified to Regulate the Swarming Motility in Vibrio parahaemolyticus
Source: MDPI journal article supplement (doi:10.3390/pathogens11040453), 2022-04-10
Supplement: s1 [file s1]

A

VPA0041 binding site

vpa0264

TTTCCACTCTTGTTTGTAAAGTCATTGATAAAATATAAAATAAAATTTAT-N55-ATG

vpa1548

CCAACTTAGTGGAATGCAAGTCACTAAAAATCATCAATTTTGATCTT-N116-ATG

vpa1550

CGATAAGACATACTTTCAAGGCATAGAGTTACGCCAATTACCAATGA-N16-ATG

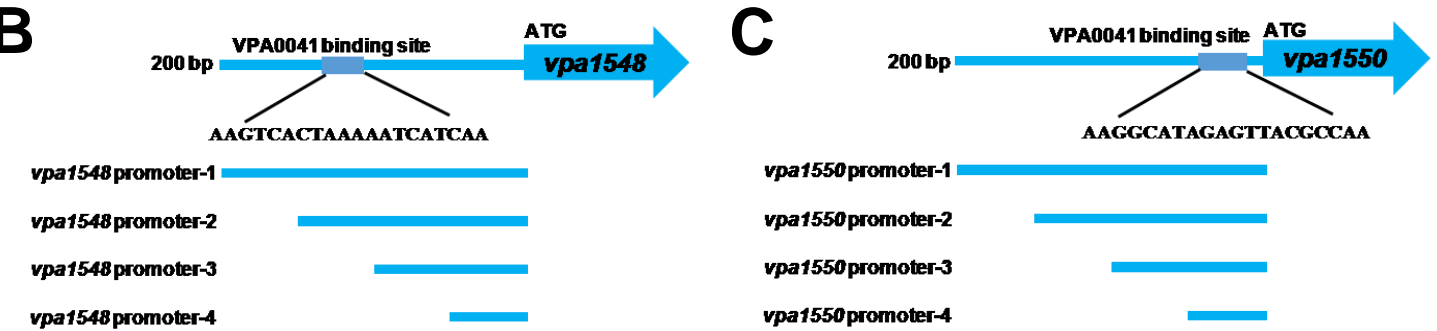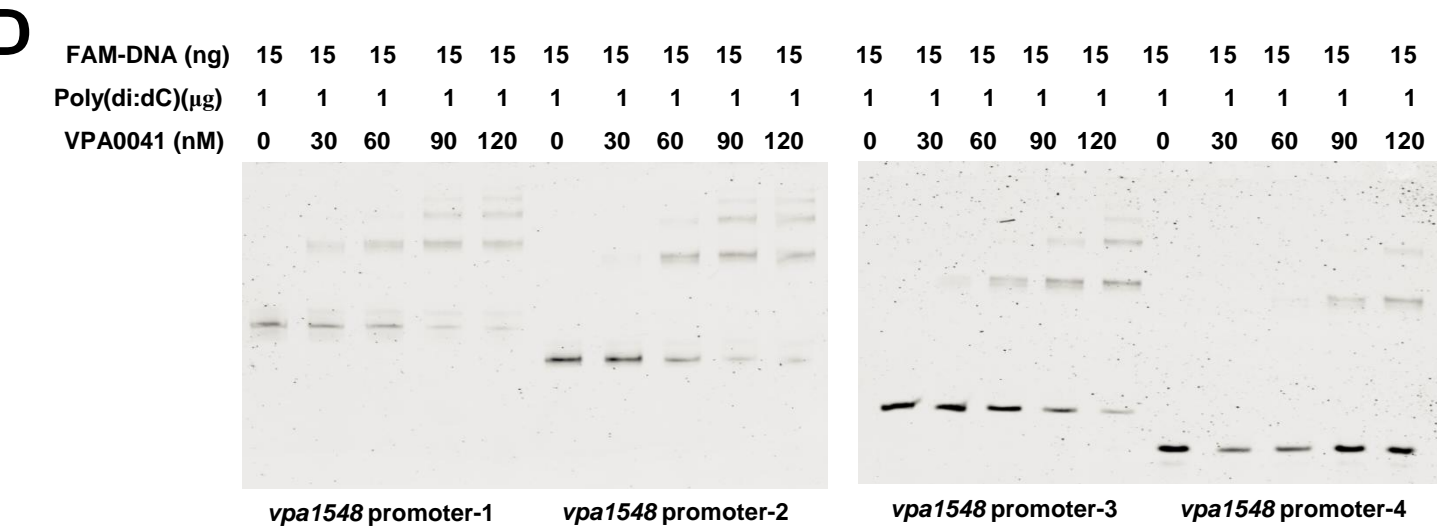

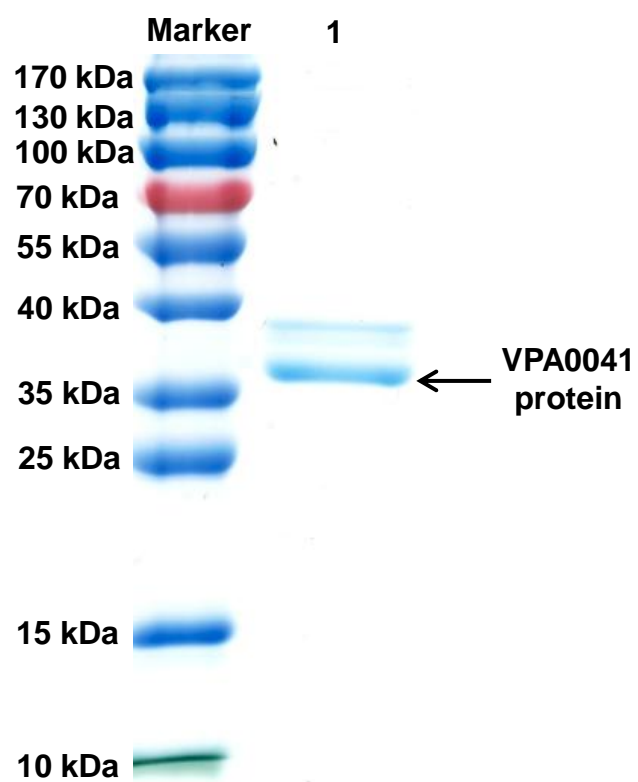

**Figure S2**
